# Supplementary material for: Exploiting the reversible covalent bonding of boronic acids for self-healing/recycling of main-chain polybenzoxazines
Source: Royal Society of Chemistry journal article supplement (doi:10.1039/d2py00068g), 2022-01-01
Supplement: d2py00068g1.pdf [file d2py00068g1.pdf]

## Electronic Supplementary Information

# Exploiting the Reversible Covalent Bonding of Boronic Acids for Self-Healing/Recycling of Main-Chain Polybenzoxazines

Sevinc Gulyuz<sup>a</sup>, Yusuf Yagci<sup>a</sup>, Baris Kiskan<sup>\*,a</sup>

<sup>a</sup>Istanbul Technical University, Department of Chemistry, 34469, Maslak, Istanbul, Turkey.

### CONTENTS:

| Title                                                                                                                                                                                                       | Page |
|-------------------------------------------------------------------------------------------------------------------------------------------------------------------------------------------------------------|------|
| Synthesis of <i>p</i> -cresol and benzylamine based benzoxazine (C-Bn)                                                                                                                                      | 2    |
| <b>Figure S1:</b> <sup>1</sup> H NMR spectrum of PPO <sub>900</sub> -Bz.                                                                                                                                    | 2    |
| <b>Figure S2:</b> FTIR spectrum of PPO <sub>900</sub> -Bz                                                                                                                                                   | 3    |
| <b>Figure S3:</b> <sup>1</sup> H NMR spectrum of PPO <sub>600</sub> -Bz.                                                                                                                                    | 3    |
| <b>Figure S4:</b> FTIR spectrum of PPO <sub>600</sub> -Bz.                                                                                                                                                  | 4    |
| <b>Figure S5:</b> GPC chromatograms of PPO <sub>900</sub> -Bz (A) and PPO <sub>600</sub> -Bz (B)                                                                                                            | 4    |
| <b>Figure S6:</b> The PPO <sub>900</sub> -Bz (right) and PPO <sub>900</sub> -Bz-Bor (left) in molds before thermal treatment (A), cured PPO <sub>900</sub> -Bz-Bor (B) and cured PPO <sub>900</sub> -Bz (C) | 5    |
| <b>Figure S7:</b> The overlaid FTIR spectra of cured PPO <sub>900</sub> -Bz-Bor (a) and PPO <sub>600</sub> -Bz-Bor (b)                                                                                      | 5    |
| <b>Figure S8:</b> <sup>1</sup> H NMR spectrum of C-Bn.                                                                                                                                                      | 6    |
| <b>Scheme S1:</b> Synthesis, oligomerization of C-Bn monomer and reaction between oligo C-Bn and PhB(OH) <sub>2</sub>                                                                                       | 6    |
| <b>Figure S9:</b> <sup>1</sup> H NMR spectra of oligo C-Bn (a) and boron modified oligo C-Bn (b)                                                                                                            | 7    |
| <b>Figure S10:</b> Images of solubility tests for cured PPO <sub>900</sub> -Bz-Bor in different solvents                                                                                                    | 7    |
| <b>Table S1.</b> Solvent fractions of PPO <sub>900</sub> -Bz-Bor in different solvents at 30 °C                                                                                                             | 8    |
| <b>Figure S11:</b> Swelling ratio vs time graphs for cured PPO <sub>900</sub> -Bz-Bor film in acetone and water.                                                                                            | 8    |
| <b>Figure S12:</b> Image of a representative set-up for self-healing experiments.                                                                                                                           | 9    |
| <b>Figure S13:</b> Images of cured PPO <sub>600</sub> -Bz-Bor (A) and recycled (2 times) (B)                                                                                                                | 9    |
| <b>Figure S14:</b> Overlaid DSC thermograms for cured PPO <sub>900</sub> -Bz-Bor and annealed sample.                                                                                                       | 9    |
| <b>Scheme S2:</b> Formation and rearrangement of phenoxymethyl type bridges                                                                                                                                 | 10   |
| <b>Figure S15:</b> Stress-strain analysis of PPO <sub>600</sub> -Bz-Bor (A), PPO <sub>600</sub> -Bz (B) and healing efficiencies of PPO <sub>600</sub> -Bz-Bor (A'), PPO <sub>600</sub> -Bz (B').           | 10   |
| <b>Figure S16:</b> Overlaid DSC thermograms of PPO <sub>900</sub> -Bz (a) and PPO <sub>900</sub> -Bz/PhB(OH) <sub>2</sub> 10%wt mixture (b)                                                                 | 11   |
| <b>Figure S17:</b> Normalized relaxation module (G) vs time graphs for PPO <sub>900</sub> -Bz-Bor, self-healed sample and PPO <sub>900</sub> -Bz as reference                                               | 11   |
| <b>Table S2:</b> Thermal properties of the cured <sup>a</sup> PPO <sub>900</sub> -Bz and PPO <sub>900</sub> -Bz-Bor polymers.                                                                               | 12   |

## Synthesis of *p*-cresol and benzylamine based benzoxazine (C-Bn)

In a round bottomed flask equipped with a stirrer *p*-cresol (10 g, 92.5 mmol), benzylamine (9.9 g, 92.5 mmol) and paraformaldehyde (5.6 g, 186 mmol) was dissolved in toluene:EtOH (2:1, v:v) (150 mL). The mixture was refluxed for 12 h. After cooling the content, the reaction solution was filtered with an ordinary filter paper. The solvent was removed by rotary evaporator and the remaining was dissolved in CHCl<sub>3</sub>. The chloroform solution was washed with 1 M NaOH<sub>(aq)</sub> solution three times and deionized water with 2 times. Then, the chloroform solution was dried by using anhydrous Na<sub>2</sub>SO<sub>4</sub> and the solid particles filtered. The remaining solution was evaporated. Crystallization from acetone/ethanol mixture gave the desired product. (Yield: ~80%)

Typical curing procedure of C-Bn with PhB(OH)<sub>2</sub> is as follows: C-Bn (99.1 mg, 0.41 mmol) and 10 % wt PhB(OH)<sub>2</sub> (11.01 mg, 0.09 mmol) were dissolved in 0.5 mL of CHCl<sub>3</sub> in a glass vial. The solvent was evaporated at room temperature for 1 day and in a vacuum for 1 days. After the solvent removal, mixture was exposed to thermal curing at 200 °C for 4 h in an open-air oven.

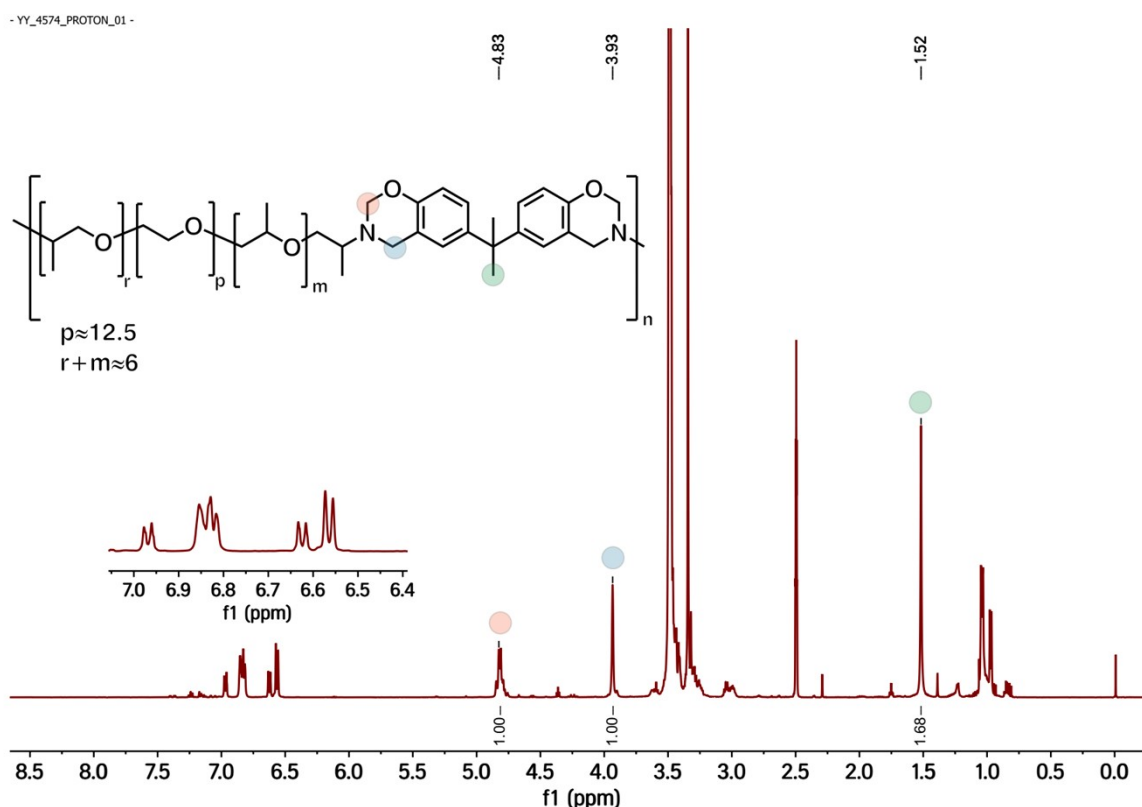

**Figure S1:** <sup>1</sup>H NMR spectrum of PPO<sub>900</sub>-Bz. \*Residue of DMSO and water.

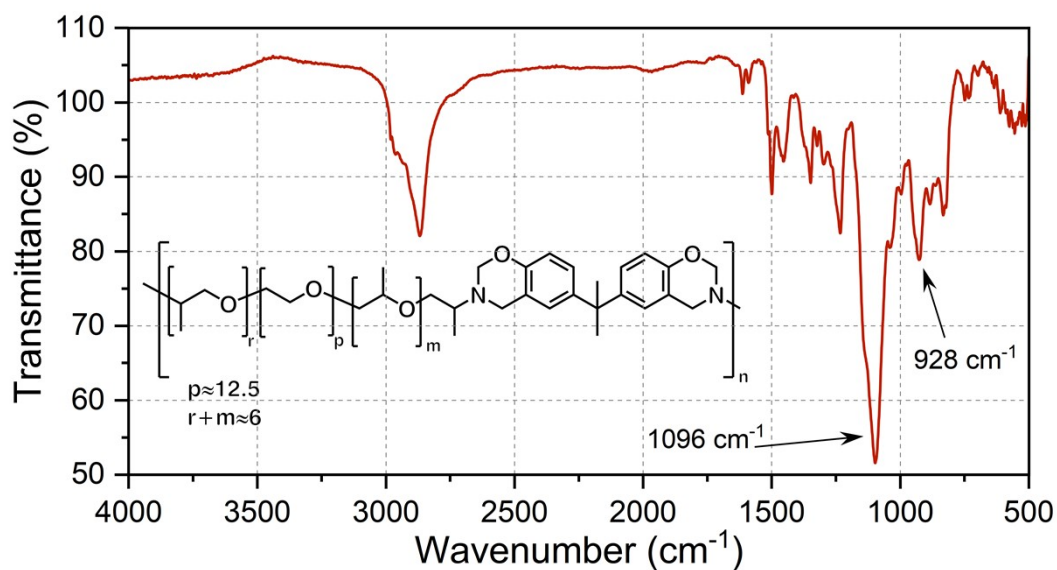

Figure S2: FTIR spectrum of PPO<sub>900</sub>-Bz

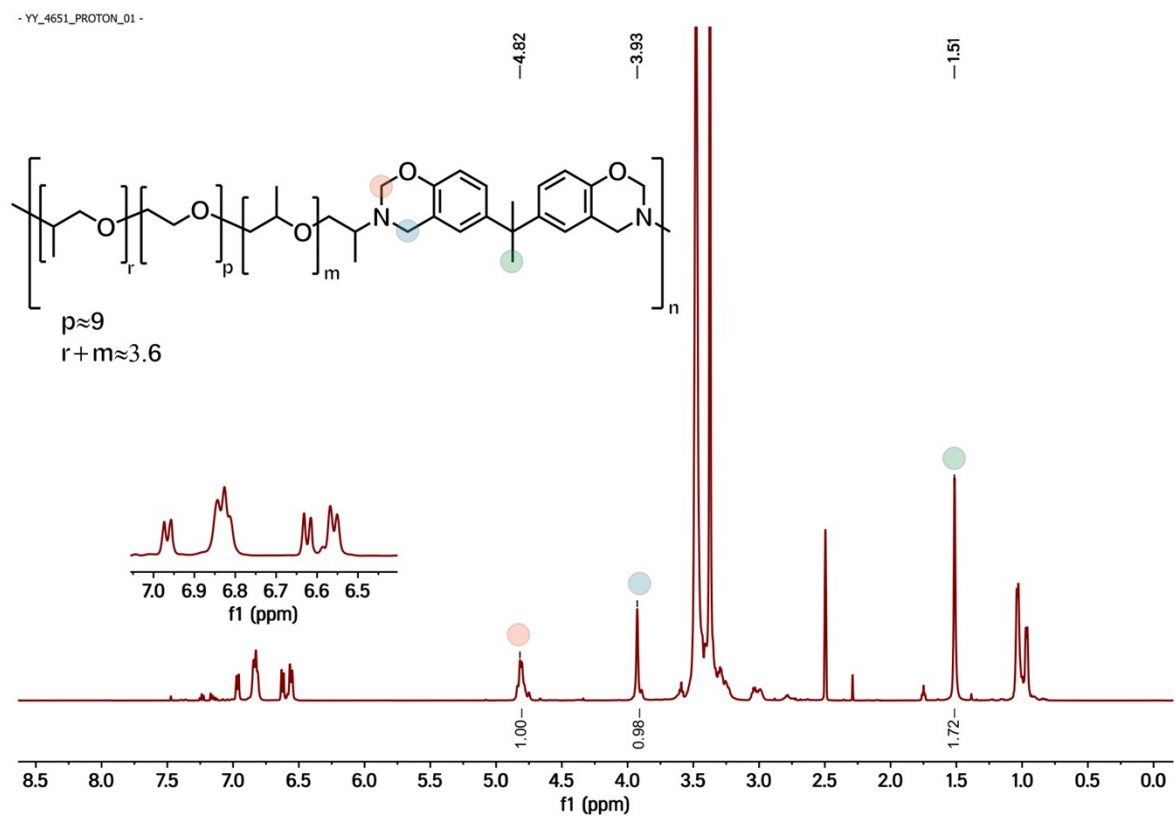

Figure S3: <sup>1</sup>H NMR spectrum of PPO<sub>600</sub>-Bz. \*Residue of DMSO and water.

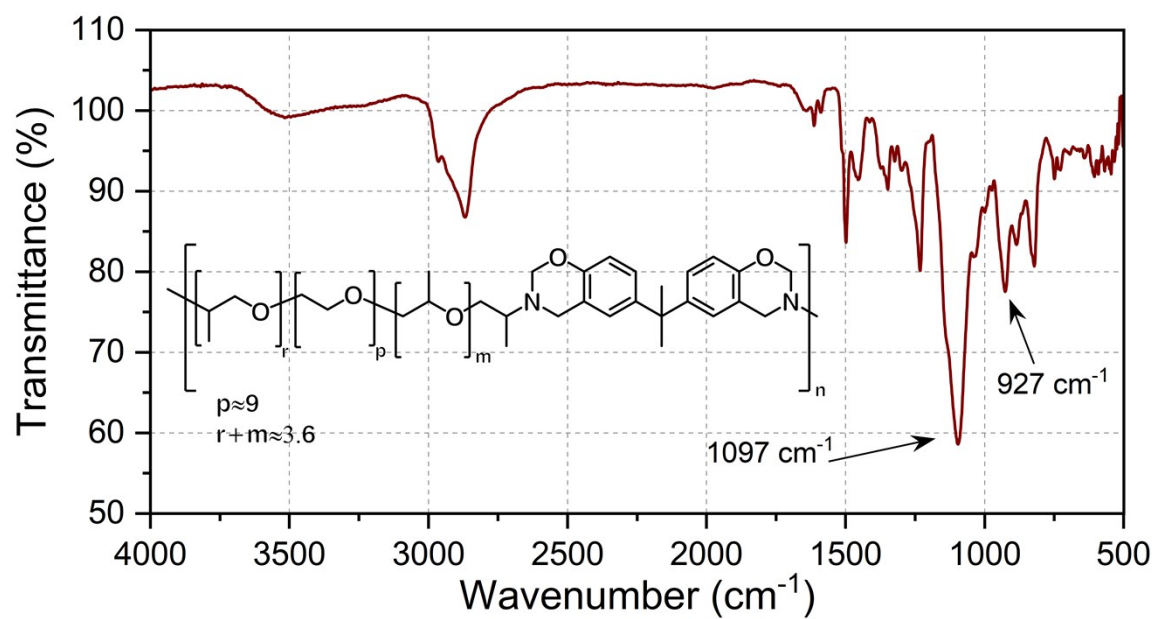

Figure S4: FTIR spectrum of PPO<sub>600</sub>-Bz.

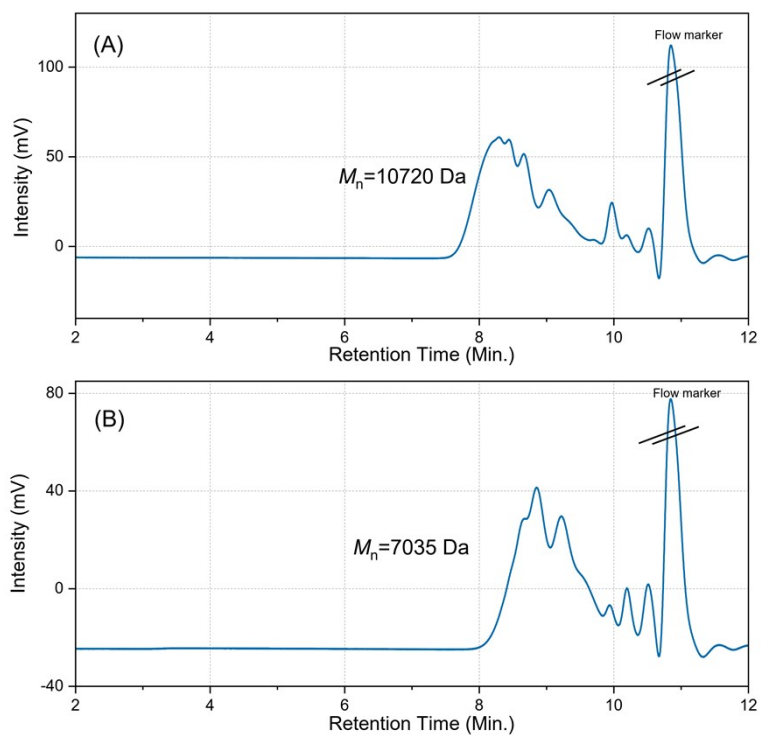

Figure S5: GPC chromatograms of PPO<sub>900</sub>-Bz (A) and PPO<sub>600</sub>-Bz (B)

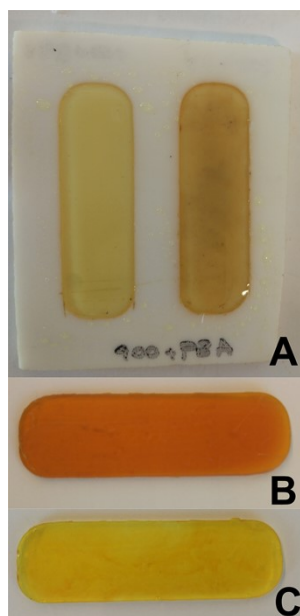

**Figure S6:** The PPO<sub>900</sub>-Bz (right) and PPO<sub>900</sub>-Bz-Bor (left) in molds before thermal treatment (A), cured PPO<sub>900</sub>-Bz-Bor (B) and cured PPO<sub>900</sub>-Bz (C)

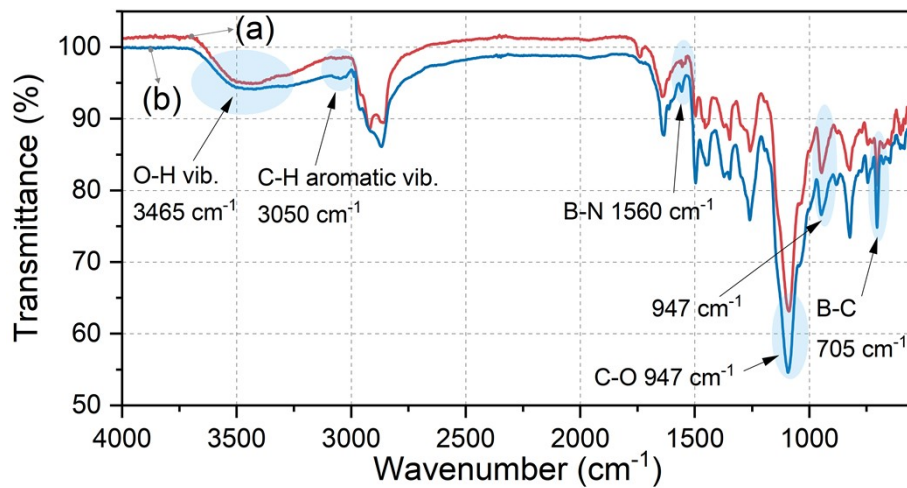

**Figure S7:** The overlaid FTIR spectra of cured PPO<sub>900</sub>-Bz-Bor (a) and PPO<sub>600</sub>-Bz-Bor (b)

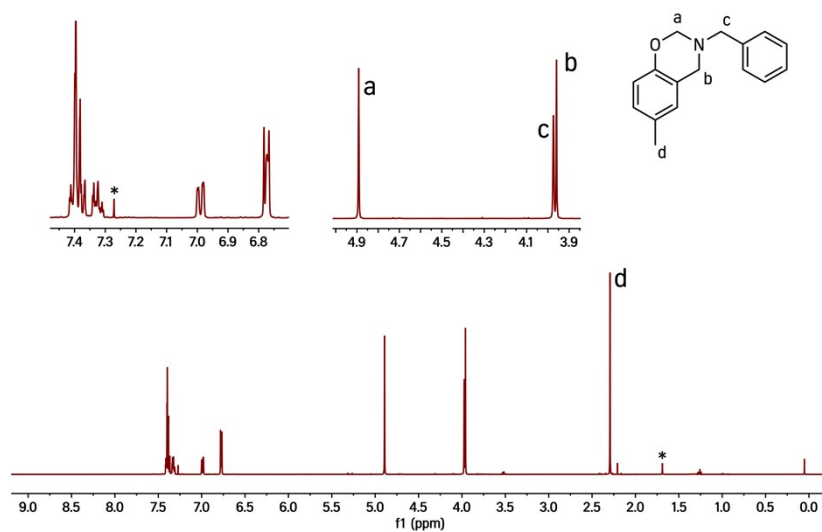

**Figure S8:**  $^1\text{H}$  NMR spectrum of C-Bn.  $^*\text{CHCl}_3$  and  $\text{H}_2\text{O}$

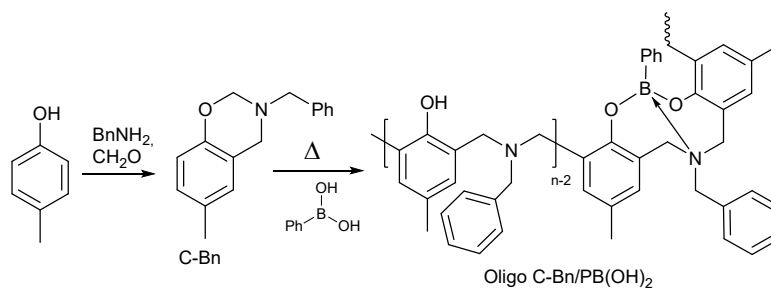

**Scheme S1:** Synthesis, oligomerization of C-Bn monomer and reaction between oligo C-Bn and  $\text{PhB}(\text{OH})_2$

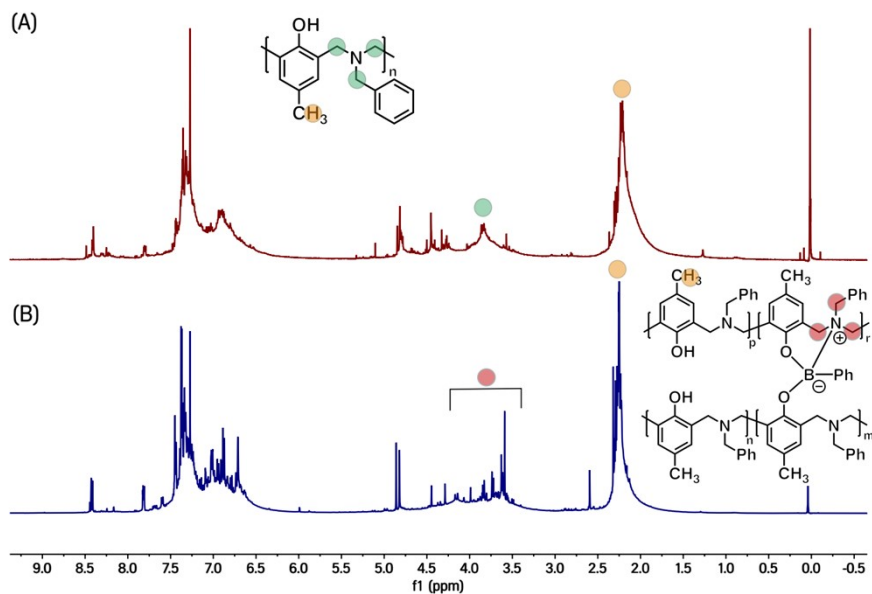

**Figure S9:** <sup>1</sup>H NMR spectra of oligo C-Bn (a) and boron modified oligo C-Bn (b)

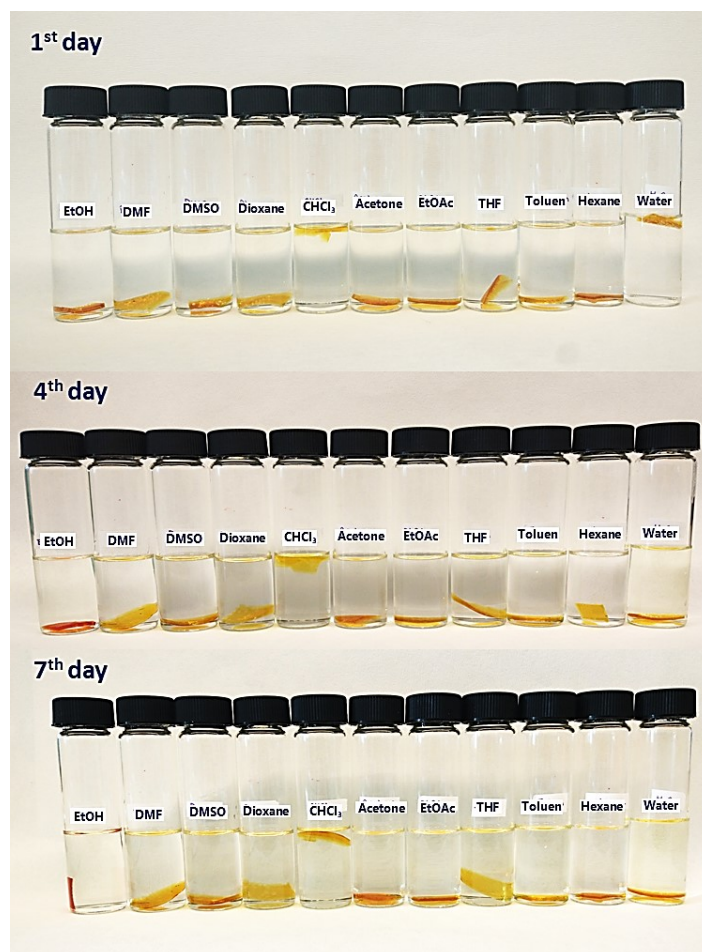

**Figure S10:** Images of solubility tests for cured PPO<sub>900</sub>-Bz-Bor in different solvents

**Table S1.** Solvent fractions of PPO<sub>900</sub>-Bz-Bor in different solvents at 30 °C.

| Solvent           | Gel fraction (%-wt) |
|-------------------|---------------------|
| EtOH              | 91                  |
| DMF               | 91                  |
| DMSO              | 94                  |
| 1,4-Dioxane       | 93                  |
| CHCl <sub>3</sub> | 90                  |
| Acetone           | 93                  |
| EtOAc             | 94                  |
| THF               | 93                  |
| Toluene           | 99                  |
| Hexane            | 99                  |
| Water             | 88                  |

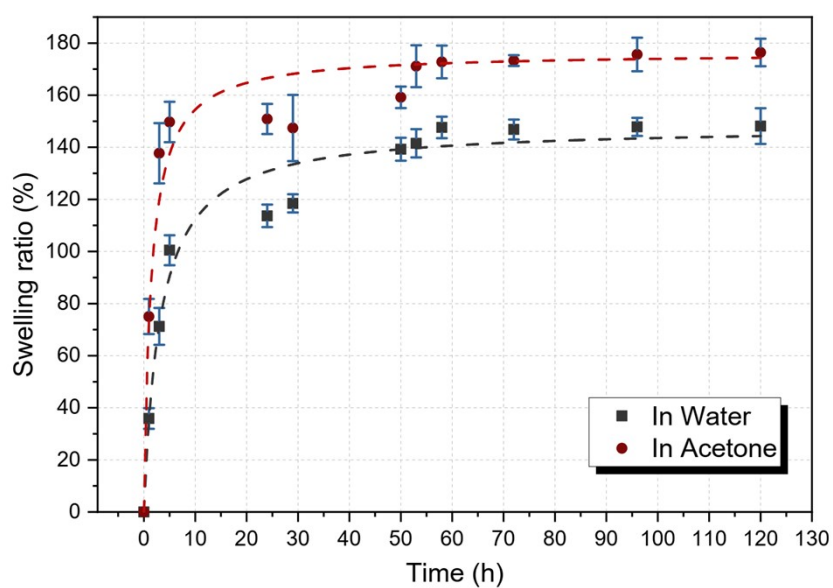

**Figure S11:** Swelling ratio vs time graphs for cured PPO<sub>900</sub>-Bz-Bor film in acetone and water. Curve fitting added as dashed lines.



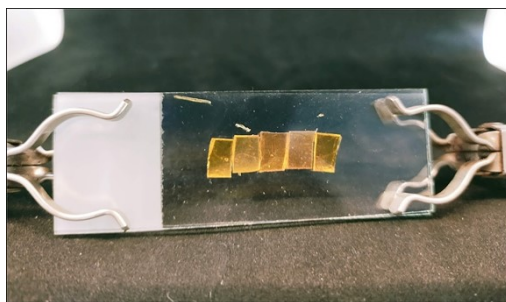

**Figure S12:** Image of a representative set-up for self-healing experiments

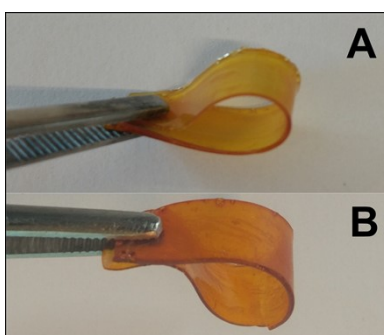

**Figure S13:** Images of cured PPO<sub>600</sub>-Bz-Bor (A) and recycled (2 times) (B)

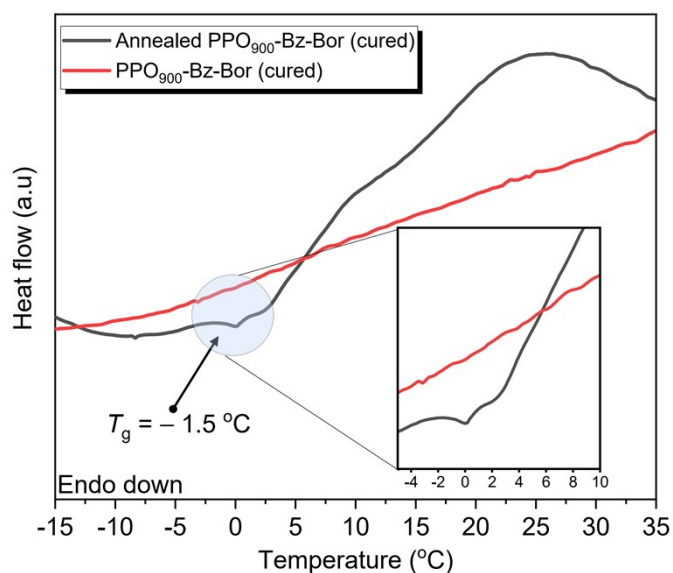

**Figure S14:** Overlaid DSC thermograms for cured PPO<sub>900</sub>-Bz-Bor and annealed sample. Annealing was performed as follows: A piece of film was heated up to 100 °C and then immediately dropped in liquid nitrogen.

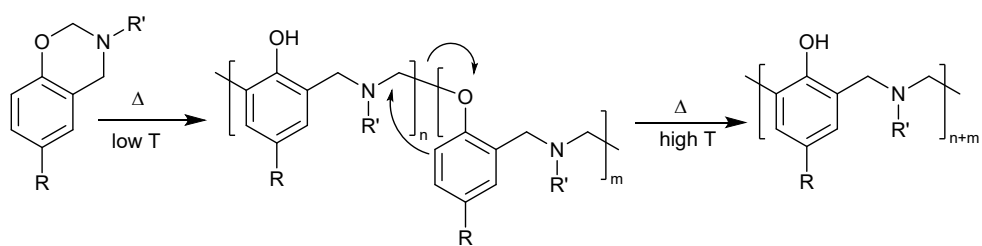

**Scheme S2:** Formation and subsequent rearrangement of phenoxyethyl type bridges

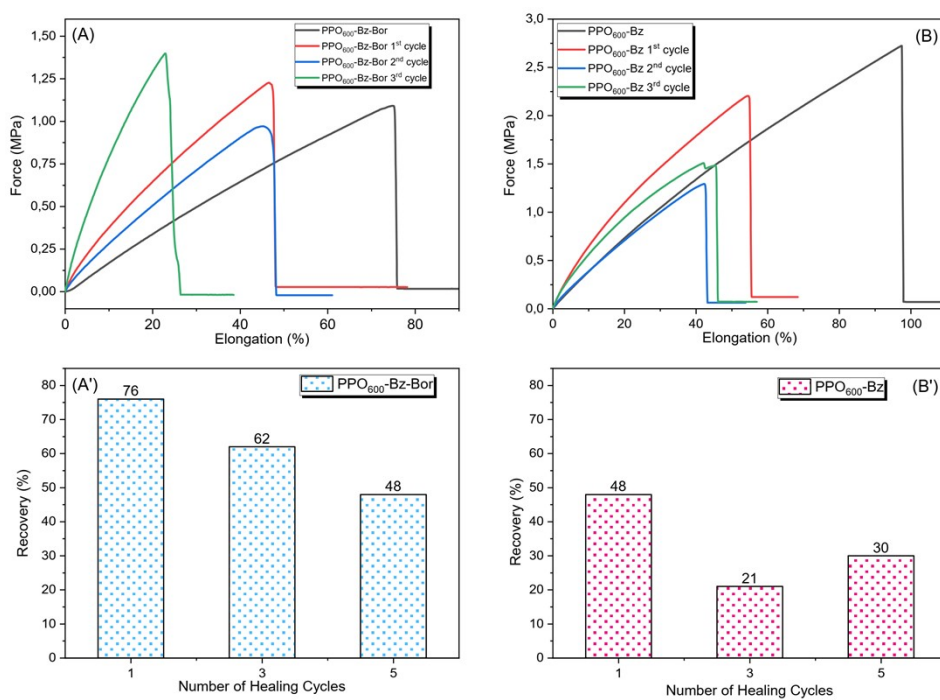

**Figure S15:** Stress-strain analysis of PPO<sub>600</sub>-Bz-Bor (A), PPO<sub>600</sub>-Bz (B) and healing efficiencies of PPO<sub>600</sub>-Bz-Bor (A'), PPO<sub>600</sub>-Bz (B')

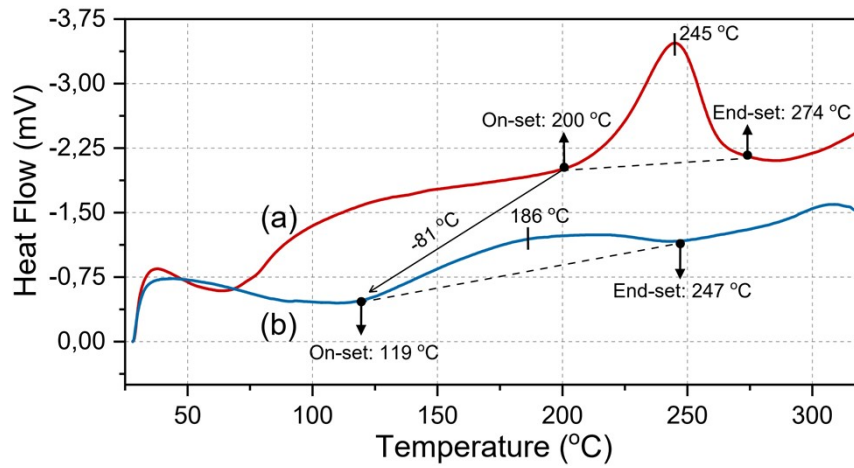

**Figure S16:** Overlaid DSC thermograms of PPO<sub>900</sub>-Bz (a) and PPO<sub>900</sub>-Bz/PhB(OH)<sub>2</sub> 10%wt mixture (b)

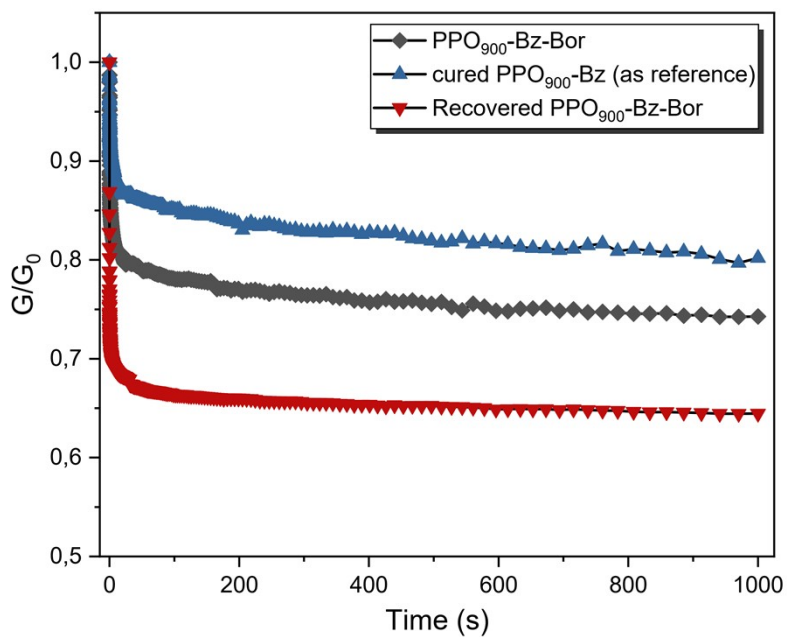

**Figure S17:** Normalized relaxation module (G) vs time graphs for PPO900-Bz-Bor, self-healed sample and PPO900-Bz as reference

**Table S2:** Thermal properties of the cured<sup>a</sup> PPO<sub>900</sub>-Bz and PPO<sub>900</sub>-Bz-Bor polymers.

| <b>Cured Sample</b>                                | <b>T<sub>5%</sub><br/>(°C)</b> | <b>T<sub>10%</sub><br/>(°C)</b> | <b>T<sub>c</sub><br/>(%)</b> | <b>T<sub>max</sub><br/>(°C)</b> |
|----------------------------------------------------|--------------------------------|---------------------------------|------------------------------|---------------------------------|
| PPO <sub>900</sub> -Bz                             | 331                            | 358                             | 15                           | 405                             |
| PPO <sub>900</sub> -Bz-Bor                         | 220                            | 323                             | 18                           | 415                             |
| PPO <sub>900</sub> -Bz-Bor 3 <sup>rd</sup> recycle | 277                            | 339                             | 22                           | 416                             |
| PPO <sub>900</sub> -Bz-Bor 5 <sup>th</sup> recycle | 314                            | 352                             | 25                           | 416                             |

<sup>a</sup> Curing of polymers was performed in an open-air oven device at *ca.* 180 °C for 30 min. T<sub>5%</sub>: The temperature for which the weight loss is 5% by mass, T<sub>10%</sub>: The temperature for which the weight loss is 10% by mass, T<sub>c</sub>: The char yield at 800 °C, T<sub>max</sub>: The temperature for maximum weight loss that extracted from derivative TGA graph (Fig. 7).
